Title : LUNG FUNCTION IN CHRONIC RESPIRATORY FAILURE IN INFANCY

Authors : N.V. Loeber, M.D. and J.J. Downes, M.D.

Affiliation: Department of Anesthesia, The Children's Hospital of Philadelphia and University of Pennsylvania, Philadelphia, Pennsylvania 19104

**Introduction:** To determine the sequential changes in pulmonary gas exchange and mechanics that contribute to chronic respiratory failure in infancy, we studied 7 infants who had been mechanically ventilated (MV) from age 1-3 days until 4-15 mos. Informed consent was obtained from the parents and permission granted by the Committee for the Protection of Human Subjects.

**Methods:** All infants were born prematurely ( $\leq 36$  wk gestation) and had tracheostomies. Six infants had bronchopulmonary dysplasia (BPD), one aspiration. Every infant was severely growth retarded to  $\leq$  the 3rd percentile for weight; age range was 4-15 months; weight 2.1-7.5 kg. The IMV rates prior to the studies ranged from 0-55,  $F_{I,O_2}$  0.21-0.45, inflation pressures (IP) 22-38 cmH<sub>2</sub>O, and PEEP 0-8 cmH<sub>2</sub>O. For the study of respiratory mechanics, the 5 infants on mechanical ventilation received an  $F_{I,O_2}$  of 0.50, IMV rate of 6, IP 25-30 cmH<sub>2</sub>O, and PEEP 1-2 cmH<sub>2</sub>O. The other two infants were studied with the same conditions without IMV. All infants were supine and tolerated the 3-5 minutes of the study well. No audible tracheal air leak occurred in any patient. End tidal PCO<sub>2</sub> (PECO<sub>2</sub>) and airway pressure were determined at the tracheostomy; an esophageal balloon was placed in the distal third of the esophagus to measure intrathoracic pressure. A pressure transducer, pneumotachometer, integrator, and recorder were used to measure the patient's spontaneous minute volume ( $V_E$ ), respiratory rate ( $f$ ), tidal volume ( $V_T$ ) and flow during the 10 seconds between IMV breaths. Calculations of inspiratory and expiratory lower airway resistance ( $R_{A-I}$ ,  $R_{A-E}$ ) were done at iso-volume points (50% of  $V_T$ ). The dynamic lung compliance ( $C_L$ ) was measured in the conventional manner at points of no flow.

**Results.** Patient data and the range of published normal values<sup>1-5</sup> are summarized in the Table. Patients 1 and 2 with the most severe BPD had a marked reduction in  $V_T$ , hypercapnia (PECO<sub>2</sub>  $\geq 50$  torr), and a higher  $R_{A-I}$  than the less ill infants. Patient 2 also had an exceptionally high  $R_{A-E}$ , indicating severe lower airways obstruction. Chest X-rays of both infants showed extreme hyperinflation. Patients 3-7, all recovering from pulmonary disease, had elevated  $V_E$  and  $V_T$  with normal or moderately elevated PECO<sub>2</sub> (36-46 torr). Five of the 6 patients (1, 2, 3, 5, 7) in whom  $R_A$  was measured had significant elevations in either  $R_{A-I}$  and/or  $R_{A-E}$ . Three patients (2, 4, 5) had borderline low  $C_L$ .

**Discussion:** Data in these infants with chronic respiratory failure associated with BPD, resulting from premature birth and severe acute pulmonary disease, indicate that mismatching of ventilation and perfusion with a large physiologic dead space (wasted ventilation) probably exists. Also, elevated  $R_A$  and borderline low  $C_L$  contribute to increased work of breathing and probable increases in metabolic rate. These abnormalities of ventilation and mechanics diminish as the infant recovers (Patient 6). We conclude that chronic respiratory failure with BPD in

infancy is characterized by high minute volumes, lower airways obstruction, and moderate to severe hypercapnia.

#### References.

1. Cook CD, Sutherland JM, Segal S, et al: Studies of respiratory physiology in the newborn infant. III. Measurements of mechanics of respiration. J Clin Invest 36:440-448, 1957
2. Kong GP, Polgar G: The nasal resistance of newborn infants. Physiologist 7:183, 1964
3. Polgar G: Airway resistance in the newborn. J Pediatr 59:915-921, 1961
4. Avery ME, Normand C: Respiratory physiology of the newborn infant. Anesthesiology 26, 510-521, 1965
5. Nelson NM, Prod'homme LS, Cherry RB, et al: Pulmonary function in the newborn infant. I. Methods: ventilation and gaseous metabolism. Pediatrics 30:963-974, 1962.

| TABLE | Pat. No.      | Diag-<br>nosis | Age<br>(Mos.) | Wt.<br>(kg) | Duration Study |             | $f$ | $V_T$ (kg<br>(ml)) | $V_E$ (kg<br>(ml)) | PECO <sub>2</sub><br>(torr) | $C_L$ (kg<br>(ml)) | $R_{A-I}$<br>(cmH <sub>2</sub> O/l/sec) | $R_{A-E}$<br>(cmH <sub>2</sub> O/l/sec) |
|-------|---------------|----------------|---------------|-------------|----------------|-------------|-----|--------------------|--------------------|-----------------------------|--------------------|-----------------------------------------|-----------------------------------------|
|       |               |                |               |             | MV<br>(mos.)   | IMV<br>rate |     |                    |                    |                             |                    |                                         |                                         |
|       | 1             | BPD            | 7             | 4.6         | 7              | 50          | 60  | 2                  | 117                | 53                          | 2.6                | 50                                      | 30                                      |
|       | 2             | BPD            | 8.5           | 3.4         | 9              | 30          | 50  | 4.4                | 221                | 50                          | 1.1                | 67                                      | 230                                     |
|       | 3             | BPD            | 15.5          | 7.5         | 16             | 30          | 60  | 5.5                | 331                | 46                          | 1.3                | 10                                      | 77                                      |
|       | 4             | BPD            | 13            | 6.3         | 13             | 4           | 50  | 7.1                | 393                | 45                          | 1.1                | 10                                      | 37                                      |
|       | 5             | BPD            | 4.5           | 2.1         | 4              | 1           | 90  | 9.5                | 855                | 40                          | 2.1                | 41                                      | 50                                      |
|       | 6             | Aspir.         | 10            | 6.7         | 8              | 0           | 30  | 13                 | 390                | 36                          | -                  | -                                       | -                                       |
|       | 7             | Apnea-<br>BPD  | 3             | 2.8         | 2.5            | 0           | 60  | 12.5               | 750                | 42                          | 3.2                | 48                                      | 71                                      |
|       | Normal Range: |                |               |             |                |             |     |                    |                    |                             |                    |                                         |                                         |
|       |               |                |               |             |                | 30-50       | 5-7 | 150-300            | 30-40              | 2                           | 1.5-2              | 10-30                                   | 40                                      |
